# Supplementary material for: A beta-glucosidase of an insect herbivore determines both toxicity and deterrence of a dandelion defense metabolite
Source: eLife. 2021 Oct 11;10:e68642. doi: 10.7554/eLife.68642 (PMC8504966; doi:10.7554/eLife.68642)
Supplement: Figure 1—source data 1. [file elife-68642-fig1-data1.xlsx]

## Sheet: Figure1A
Melolontha	Treatment	Organ	TAG_relAbundance	TA_relAbundance
1	Latex	AnteriorMidgut	0	0.0976614
1	Latex	Food	1	0
1	Latex	Frass	0	0
1	Latex	PosteriorMidgut	0	0
2	Ctr	AnteriorMidgut	0	0
2	Ctr	Food	0.00723386	0
2	Ctr	Hemolymph	0	0
2	Ctr	Hindgut	0	0
2	Ctr	PosteriorMidgut	0	0
3	Latex	AnteriorMidgut	0	1
3	Latex	Food	0.959723	0.102691
3	Latex	Frass	0	0
3	Latex	Hemolymph	0	0
3	Latex	Hindgut	0	0
3	Latex	PosteriorMidgut	0	0.123841
4	Ctr	AnteriorMidgut	0	0
4	Ctr	Food	0.0223871	0.017539
4	Ctr	Hemolymph	0	0
4	Ctr	Hindgut	0	0.0317721
4	Ctr	PosteriorMidgut	0	0
5	Latex	AnteriorMidgut	0	0.327286
5	Latex	Food	0.432848	0.0688882
5	Latex	Hemolymph	0	0
5	Latex	Hindgut	0	0
5	Latex	PosteriorMidgut	0	0.0804562
5	Latex	Regurgitant	0	0
6	Ctr	AnteriorMidgut	0	0
6	Ctr	Food	0	0
6	Ctr	Frass	0	0
6	Ctr	Hemolymph	0	0
6	Ctr	Hindgut	0	0
6	Ctr	PosteriorMidgut	0	0
6	Ctr	Regurgitant	0	0
7	Latex	AnteriorMidgut	0	0.417717
7	Latex	Food	0.463506	0.0482608
7	Latex	Frass	0	0.0770028
7	Latex	Hemolymph	0	0
7	Latex	Hindgut	0	0
7	Latex	PosteriorMidgut	0	0.094745
7	Latex	Regurgitant	0	0.083046
8	Ctr	AnteriorMidgut	0	0
8	Ctr	Food	0	0
8	Ctr	Frass	0	0
8	Ctr	Hemolymph	0	0
8	Ctr	Hindgut	0	0
8	Ctr	PosteriorMidgut	0	0
9	Latex	AnteriorMidgut	0	0.617276
9	Latex	Food	0.752962	0.133832
9	Latex	Frass	0	0
9	Latex	Hemolymph	0	0
9	Latex	Hindgut	0	0.0869332
9	Latex	PosteriorMidgut	0	0.0609456
9	Latex	Regurgitant	0	0.176783
10	Ctr	AnteriorMidgut	0	0
10	Ctr	Food	0.00118304	0
10	Ctr	Frass	0	0
10	Ctr	Hemolymph	0	0
10	Ctr	Hindgut	0	0
10	Ctr	PosteriorMidgut	0	0
10	Ctr	Regurgitant	0	0

## Sheet: Figure 1D_E
MelolonthaNr	Sample	TAG(ug/extract)	TA(ug/extract)	TA-Cys(ug/extract)	TA-GSH (ug/extract)	TA-CysAc (ug/extract)	TAG-Cys (ug/extract)	TAG-GSH (ug/extract)
1	ant midgut content	0.000936311	0.0349496	9.63617	0.034268	0.0266464	0.0180303	0.000404179
1	ant midgut tissue	0.000408679	0.00569717	2.60939	0.00816736	0.0402113	0.00625925	0.000218915
1	post midgut content	0.000677581	0.0215068	3.36397	0.0180355	0.00483816	0.00775798	0.000241971
1	post midgu tissue	0.000161642	0.00208097	0.794515	0.00554881	0.00468851	0.000796269	0
1	hindgut content	0.000519424	0.0150162	2.8033	0.00550024	0.0103014	0.00372182	0
1	hindgut tissue	0.0012235	0.0107325	2.30583	0.00271154	0.0100955	0.00325894	0.00031875
1	hemolymph	0.000802222	0.000400278	0.145144	0.000224556	0.000435778	0.000197593	0.000210139
1	fat tissue	0.0002689	0.00592969	2.76502	0.00524231	0.0252685	0.00976995	0.000278906
1	skin	0.00749481	0.0157578	4.40588	0.005009	0.0353356	0.0112775	0.000908824
1	head	0.0105628	0.00356813	1.19706	0.00048645	0.000574425	0.00080025	0.000578531
1	frass	0.266463	0.010564	0.00291966	0.000245508	0.000467012	0.000341077	0.000235823
2	ant midgut content	0.000365625	0.0333799	9.06332	0.0230362	0.0281151	0.00590296	0.000471834
2	ant midgut tissue	0.000467819	0.00755508	2.42657	0.0122829	0.0122028	0.00277592	0.000304293
2	post midgut content	0.00110592	0.0207405	2.94046	0.00914885	0.0104504	0.00218435	0.000364981
2	post midgu tissue	0.000278516	0.00477766	1.28356	0.0037425	0.00477518	0.000332027	0.000239969
2	hindgut content	0.000335814	0.00231512	0.34381	0.000375271	0.00121153	0.000583504	0
2	hindgut tissue	0.00461806	0.00267361	0.569676	0.000223685	0.00219944	9.87963e-05	0.000260903
2	hemolymph	0.000525181	6.56008e-05	0.00188544	0.000194823	0.000379548	8.60484e-05	0
2	fat tissue	0.000525532	0.0103369	3.59196	0.008	0.0074	0.0048156	0.00109415
2	skin	0.0117191	0.0240811	6.75463	0.0500849	0.0284571	0.00617954	0.00178697
2	head	0.0141117	0.000802573	0.114791	0.000377825	0	0.000103592	0.000225291
2	frass	0.0206095	0.00220909	0.00360351	0.000165471	0.00141456	0.000130669	0
3	ant midgut content	0.00181003	0.062507	8.77758	0.032468	0.00896657	0.0148877	0.00129276
3	ant midgut tissue	0.000217941	0.00284706	1.04377	0.00473686	0.0104688	0.00617186	0
3	post midgut content	0.00047241	0.0212323	2.40371	0.010015	0.000624602	0.00305703	0.000307279
3	post midgu tissue	0.000177541	0.00377336	0.841967	0.00574787	0.0050223	0.000922295	0
3	hindgut content	0.000641046	0.0196676	1.79355	0.0124705	0.00490436	0.00291834	0.0006649
3	hindgut tissue	0.000562597	0.00595714	0.833766	0.000628701	0.00187979	0.000694117	0.00029474
3	hemolymph	0.00019426	9.13049e-05	0.00237511	0.000216664	0	9.56951e-05	0.000208117
3	fat tissue	0.00208433	0.0055903	1.62097	0.00757612	0.0147116	0.00127693	0
3	skin	0.00124179	0.0120214	2.675	0.0124349	0.0338709	0.00152429	0.000805071
3	head	0.00244194	0.00153839	0.291928	0.00164262	0.000530598	0.000144352	0
3	frass	0.0224438	0.000947375	0.000931792	0	0.00047545	0.000259475	0.000188062
4	ant midgut content	0.00144593	0.0264352	6.06429	0.0112951	0.0103442	0.00496008	0.000748999
4	ant midgut tissue	0.000465806	0.00695484	2.38161	0.0077929	0.0291226	0.0035671	0
4	post midgut content	0.000568504	0.0413583	3.81942	0.0256588	0.00375827	0.00390801	0.000304528
4	post midgu tissue	0.000397431	0.00532844	0.98656	0.00576936	0.00651743	0.000552633	0.00021289
4	hindgut content	0.00187407	0.0106452	1.06867	0.00599454	0.00141573	0.0007967	0.000348015
4	hindgut tissue	0.00138143	0.0057172	0.674713	0.00246675	0.00218324	0.000551108	0
4	hemolymph	0.000222154	4.34923e-05	0.00246374	0.000124369	0.000292585	5.77026e-05	0.000115731
4	fat tissue	0.00210294	0.010805	2.53526	0.00811978	0.0246022	0.0048319	0.0005257
4	skin	0.0275926	0.00848349	2.15767	0.0343632	0.0148175	0.00288255	0.00132311
4	head	0.030767	0.00171375	0.0503994	0.000550114	0.000522205	0.00012125	0.000957699
4	frass	0.000816429	0.000125301	0.000410301	0	0.000428977	0.000358098	0.000211861
5	ant midgut content	0.000707976	0.118905	7.18429	0.0295429	0.00362952	0.00745206	0.000736667
5	ant midgut tissue	0.000245578	0.0169677	2.8691	0.0230204	0.0281905	0.00658764	0.000319473
5	post midgut content	0.0010376	0.0324072	3.19078	0.0130587	0.00529078	0.00541341	0.000337455
5	post midgu tissue	0.000196909	0.00957	1.52232	0.00922909	0.007104	0.00188709	0.000210955
5	hindgut content	0.000651612	0.0301799	2.59078	0.00906177	0.0127808	0.00386837	0.000347901
5	hindgut tissue	0.00045368	0.0130209	0.848852	0.00227641	0.00535303	0.00151879	0.000243554
5	hemolymph	0.000229767	0.00012586	0.00547442	0.000206946	0.000972899	0.000226584	0
5	fat tissue	0.00560417	0.0163794	3.08173	0.0134266	0.0215509	0.00414094	0.000410088
5	skin	0.0284112	0.0334112	5.01667	0.0497819	0.0211626	0.00549969	0.000722897
5	head	0.0217733	0.00149012	0.142224	0.000600199	0.000711503	0.000265093	0
5	frass	0.0151327	0.0014558	0.00151031	0.000344389	0.000504903	0.00326195	0.000205354
6	ant midgut content	0.000381959	0.0127577	5.48789	0.0132924	0.00374959	0.00283333	0.000484149
6	ant midgut tissue	0.0003317	0.00515467	3.16248	0.0099902	0.00523553	0.00146168	0.00071072
6	post midgut content	0.000667488	0.0156102	1.97843	0.0100518	0.00175821	0.000907227	0.000434168
6	post midgu tissue	0	0.00118611	0.597366	0.000830423	0.000537874	0.000213954	0
6	hindgut content	0.000441272	0.0105769	1.54063	0.00381933	0.00318331	0.000631361	0.000460207
6	hindgut tissue	0.000285	0.00486316	0.746184	0.00190474	0.00181105	0.000442882	0
6	hemolymph	0.000495299	0.00013012	0.0498724	0.000221744	0.000536342	0.000121595	0.000264444
6	fat tissue	0.00153	0.00283105	1.46421	0.00152775	0.0156101	0.00157446	0.000488526
6	skin	0.000839019	0.00130561	0.291667	0.00124162	0.00177738	0.000332399	0.000722897
6	head	0.0008664	0.0004048	0.138387	0.00025944	0.00076072	0.000142267	0
6	frass	0.00159831	0.00084527	0.00027473	0.000296781	0.00112909	0.000263354	0
7	ant midgut content	0.00131008	0.0528931	9.99889	0.0341129	0.0277948	0.0322681	0.000935685
7	ant midgut tissue	0.000644844	0.0134154	4.6118	0.0139466	0.0315543	0.0115853	0.000416172
7	post midgut content	0.000349355	0.0407177	5.03935	0.0345677	0.00963194	0.0117026	0.000454476
7	post midgu tissue	0.000252052	0.00623757	0.964855	0.0111931	0.00132173	0.00573029	0.000266792
7	hindgut content	0.000596193	0.00787654	0.317771	0.0029915	0.00149827	0.00155679	0.000309568
7	hindgut tissue	0.000627321	0.00981646	0.319044	0.00341097	0.00129266	0.00199184	0.000317405
7	hemolymph	0.000271098	9.37683e-05	0.00685061	0.00029461	0.00069578	0.000126573	0.000343628
7	fat tissue	0.00107761	0.00443284	0.609527	0.00301642	0.00117075	0.00106169	0.000700933
7	skin	0.0820576	0.00402767	0.0605632	0.022391	0.00264404	0.00362388	0.000651826
7	head	0.0259292	0.00264308	0.0386897	0.0060084	0.000890762	0.00357527	0.000438219
7	frass	0.170149	0.0069713	0.000311418	0.000228794	0.00065504	0.000927681	0.000260563
8	ant midgut content	0.00184497	0.0376661	5.6052	0.0504429	0.00941704	0.00565145	0.000981772
8	ant midgut tissue	0.000646958	0.0261944	3.11157	0.0355638	0.00889318	0.00538249	0.000418064
8	post midgut content	0.000601667	0.0225729	2.37778	0.0231083	0.00317583	0.00254625	0.000391354
8	post midgu tissue	0.0005415	0.00880688	1.33081	0.0099875	0.00114885	0.000534712	0.000350625
8	hindgut content	0.00153578	0.019561	0.869611	0.012406	0.00100802	0.00188516	0.000409982
8	hindgut tissue	0.0125094	0.011251	0.70304	0.00227114	0.00185348	0.000580698	0.000302919
8	hemolymph	0.00024763	0.000463981	0.0807994	0.000152657	0.000721062	6.7425e-05	0
8	fat tissue	0.000342334	0.00808887	1.59873	0.0108687	0.00325629	0.00318281	0.000562793
8	skin	0.0879322	0.00924289	1.24092	0.0279737	0.0050035	0.00333239	0.000616575
8	head	0.0454044	0.00115123	0.0396005	0.00118422	0.00076902	0.000183856	0.00113958
8	frass	0.0477479	0.000568372	0.00326696	0	0.000491273	0.000194405	0

## Sheet: Figure1-FigureSupplement1
Melolontha	Treat	Organ	TA_GSH_PeakArea	TA_CysGly_PeakArea	TA_CysGlu_PeakArea	TA_Cys_PeakArea
1	Latex	1Food	3.26767e+07	0	0	0
1	Latex	4AnteriorMidgut	1.07889e+08	5.72836e+06	0	3.82422e+07
1	Latex	5PosteriorMidgut	4.43285e+06	0	0	4.36439e+06
1	Latex	7Frass	0	0	0	0
2	Ctr	1Food	831530	0	0	0
2	Ctr	2Hemo	0	0	0	0
2	Ctr	4AnteriorMidgut	0	0	0	1.71764e+06
2	Ctr	5PosteriorMidgut	0	0	0	0
2	Ctr	6Hindgut	0	0	0	0
3	Latex	1Food	6.01038e+07	0	0	1.75611e+06
3	Latex	2Hemo	1.53417e+06	9.53092e+06	0	967113
3	Latex	4AnteriorMidgut	1630792357	2.95326e+07	2.38055e+07	3.02679e+08
3	Latex	5PosteriorMidgut	1.42595e+08	1.04906e+07	1.743e+06	3.31582e+07
3	Latex	6Hindgut	6.77071e+06	9.52266e+06	0	3.14853e+07
3	Latex	7Frass	326127	0	0	0
4	Ctr	1Food	7.5216e+06	0	0	0
4	Ctr	2Hemo	0	0	0	0
4	Ctr	4AnteriorMidgut	1.02548e+07	0	0	1.48538e+07
4	Ctr	5PosteriorMidgut	0	0	0	0
4	Ctr	6Hindgut	0	0	0	0
5	Latex	1Food	3.84201e+07	0	740784	2.10233e+06
5	Latex	2Hemo	3.02164e+06	5.94445e+06	0	381384
5	Latex	3Reg	0	0	0	0
5	Latex	4AnteriorMidgut	5.7154e+08	2.35554e+07	1.36882e+07	3.37605e+08
5	Latex	5PosteriorMidgut	1.17406e+08	1.26487e+07	3.99822e+06	9.52782e+07
5	Latex	6Hindgut	8.92822e+06	1.35215e+06	0	6.17662e+06
6	Ctr	1Food	499981	0	0	0
6	Ctr	2Hemo	0	0	0	0
6	Ctr	3Reg	6.28538e+06	941642	0	4.38464e+06
6	Ctr	4AnteriorMidgut	0	0	0	0
6	Ctr	5PosteriorMidgut	0	0	0	0
6	Ctr	6Hindgut	0	0	0	0
6	Ctr	7Frass	0	0	0	0
7	Latex	1Food	2.35958e+07	0	825786	1.78722e+06
7	Latex	2Hemo	777284	398592	0	822037
7	Latex	3Reg	9.92552e+07	6.76853e+06	2.83262e+06	6.56886e+07
7	Latex	4AnteriorMidgut	9.45705e+08	2.69447e+07	3.3457e+07	6.55753e+08
7	Latex	5PosteriorMidgut	1.2429e+08	1.07653e+07	5.19917e+06	109608698
7	Latex	6Hindgut	6.39784e+06	3.59449e+06	0	1.38414e+07
7	Latex	7Frass	3.53065e+07	1.50152e+06	1.04551e+06	2.03979e+07
8	Ctr	1Food	909067	0	0	0
8	Ctr	2Hemo	0	0	0	0
8	Ctr	4AnteriorMidgut	5.10605e+06	0	0	7.34972e+06
8	Ctr	5PosteriorMidgut	0	0	0	0
8	Ctr	6Hindgut	0	0	0	0
8	Ctr	7Frass	0	0	0	0
9	Latex	1Food	3.55838e+07	0	2.40372e+06	2.99723e+06
9	Latex	2Hemo	2.60598e+06	7.2039e+06	0	868117
9	Latex	3Reg	1.91549e+08	4.5533e+06	2.07569e+06	8.18392e+07
9	Latex	4AnteriorMidgut	1088687357	3.55354e+07	23143263	5.42805e+08
9	Latex	5PosteriorMidgut	2.28952e+08	2.23733e+07	6.18852e+06	115119206
9	Latex	6Hindgut	6.58676e+07	2.1696e+07	833753	5.82951e+07
9	Latex	7Frass	0	0	0	0
10	Ctr	1Food	1.70031e+06	0	0	0
10	Ctr	2Hemo	0	0	0	0
10	Ctr	3Reg	0	0	0	778323
10	Ctr	4AnteriorMidgut	0	0	0	9.54438e+06
10	Ctr	5PosteriorMidgut	0	0	0	0
10	Ctr	6Hindgut	0	0	0	0
10	Ctr	7Frass	0	0	0	0

## Sheet: Figure1-FigureSupplement7
Mel	Tissue	Notes	Exclude	TA-Cys
1	1st Mid-Content		n	5.94381e+08
1	1st Mid-Tissue		n	3.84204e+07
1	2nd Mid-Content		n	3.64713e+08
1	2nd Mid-Tissue		n	3.10015e+07
1	Hind-Content		n	5.76713e+06
1	Hind-Tissue		n	2.01685e+06
1	Fat		n	672314
1	Skin		n	0
1	Hemolymph		n	1.25948e+06
2	1st Mid-Tissue		n	9.26237e+07
2	2nd Mid-Content		n	4.98437e+08
2	2nd Mid-Tissue		n	5.0807e+07
2	Hind-Content		n	7.72431e+07
2	Hind-Tissue		n	1.29314e+07
2	Fat	contaminated with gut content	y	5.10033e+07
2	Skin		n	2.04547e+07
2	Hemolymph		n	0
3	1st Mid-Content	contaminated with hemolymph	y	9.88061e+08
3	1st Mid-Tissue		n	181049019
3	2nd Mid-Content		n	9.41992e+08
3	2nd Mid-Tissue		n	3.87215e+08
3	Hind-Tissue		n	2.08588e+08
3	Fat	contaminated with gut content	y	3.49439e+07
3	Skin		n	1.11595e+07
3	Hemolymph		n	0
4	1st Mid-Content		n	1867428221
4	1st Mid-Tissue		n	5.37718e+08
4	2nd Mid-Content		n	1364551281
4	2nd Mid-Tissue		n	2.14978e+08
4	Hind-Content		n	139296182
4	Hind-Tissue		n	2.92695e+07
4	Fat		n	1.26703e+08
4	Skin		n	5.87026e+07
4	Hemolymph		n	2.42901e+06
5	1st Mid-Content		n	2435454193
5	1st Mid-Tissue		n	6.19862e+08
5	2nd Mid-Content		n	1510643788
5	2nd Mid-Tissue		n	3.76678e+08
5	Hind-Content		n	4.62035e+07
5	Hind-Tissue		n	1.87156e+07
5	Fat		n	4.04373e+08
5	Skin		n	6.65249e+07
5	Hemolymph		n	1.96477e+06
6	1st Mid-Content		n	5.7325e+07
6	2nd Mid-Content		n	171291194
6	2nd Mid-Tissue		n	9.28905e+07
6	Hind-Content		n	1.02124e+07
6	Fat		n	1.14119e+07
6	Skin		n	2.5933e+06
6	Hemolymph		n	0
