# Supplementary material for: A beta-glucosidase of an insect herbivore determines both toxicity and deterrence of a dandelion defense metabolite
Source: eLife. 2021 Oct 11;10:e68642. doi: 10.7554/eLife.68642 (PMC8504966; doi:10.7554/eLife.68642)
Supplement: Figure 2—source data 1. [file elife-68642-fig2-data1.xlsx]

## Sheet: Figure2A_leftPanel
SeqNr	Treat	TA/TAandTAG
4	5.2	0.0358907
6	7	0.00668783
7	8	0.00670679
10	5.2	0.0327045
12	7	0.00620459
13	8	0.00657077
16	5.2	0.0297454
18	7	0.00601234
19	8	0.0065589

## Sheet: Figure2A_rightPanel
ReplicateNr	Solvent	Treatment	TA/TAandTAG
1	3	boiled	0.0162432
2	3	boiled	0.0166472
3	3	boiled	0
1	3.6	boiled	0.00922313
2	3.6	boiled	0
3	3.6	boiled	0
1	4.2	boiled	0.0134316
2	4.2	boiled	0.0100656
3	4.2	boiled	0
1	4.8	boiled	0.0194772
2	4.8	boiled	0.0122906
3	4.8	boiled	0
1	5.4	boiled	0.0158118
2	5.4	boiled	0.0111385
3	5.4	boiled	0
1	6	boiled	0.0107622
2	6	boiled	0
3	6	boiled	0
1	H2O	boiled	0.00778918
2	H2O	boiled	0
3	H2O	boiled	0
1	3	Fresh	0.0147267
2	3	Fresh	0.0163377
3	3	Fresh	0
1	3.6	Fresh	0.0119095
2	3.6	Fresh	0.00953811
3	3.6	Fresh	0
1	4.2	Fresh	0.10698
2	4.2	Fresh	0.0570477
3	4.2	Fresh	0.036458
1	4.8	Fresh	0.408075
2	4.8	Fresh	0.312182
3	4.8	Fresh	0.169093
1	5.4	Fresh	0.490949
2	5.4	Fresh	0.340778
3	5.4	Fresh	0.186858
1	6	Fresh	0.129644
2	6	Fresh	0.0778585
3	6	Fresh	0.0389105
1	H2O	Fresh	0.0798894
2	H2O	Fresh	0.0728417
3	H2O	Fresh	0.034961

## Sheet: Figure2B
Insect	Sample	Organ	Tissue	HeatTreatment	TA/TAandTAG
1	AntMid-Cont	1stMid	Cont	4deg	0.0597095
1	AntMid-Tissue	1stMid	Tissue	4deg	0.0983618
1	PostMid-Cont	PostMid	Cont	4deg	0.0203861
1	PostMid-Tissue	PostMid	Tissue	4deg	0.0285557
1	Hind-Cont	Hind	Cont	4deg	0.0145612
1	Hind-Tissue	Hind	Tissue	4deg	0.0168797
2	AntMid-Cont	1stMid	Cont	4deg	0.140479
2	AntMid-Tissue	1stMid	Tissue	4deg	0.26682
2	PostMid-Cont	PostMid	Cont	4deg	0.0284104
2	PostMid-Tissue	PostMid	Tissue	4deg	0.0513355
2	Hind-Cont	Hind	Cont	4deg	0.0114294
2	Hind-Tissue	Hind	Tissue	4deg	0.014538
3	AntMid-Cont	1stMid	Cont	4deg	0.315057
3	AntMid-Tissue	1stMid	Tissue	4deg	0.120876
3	PostMid-Cont	PostMid	Cont	4deg	0.0514076
3	PostMid-Tissue	PostMid	Tissue	4deg	0.0354562
3	Hind-Cont	Hind	Cont	4deg	0.0106499
3	Hind-Tissue	Hind	Tissue	4deg	0.0140918
4	AntMid-Cont	1stMid	Cont	4deg	0.150256
4	AntMid-Tissue	1stMid	Tissue	4deg	0.176906
4	PostMid-Cont	PostMid	Cont	4deg	0.0188742
4	PostMid-Tissue	PostMid	Tissue	4deg	0.0238024
4	Hind-Cont	Hind	Cont	4deg	0
4	Hind-Tissue	Hind	Tissue	4deg	0.0120404
5	AntMid-Cont	1stMid	Cont	4deg	0.0739487
5	AntMid-Tissue	1stMid	Tissue	4deg	0.14512
5	PostMid-Cont	PostMid	Cont	4deg	0.0199898
5	PostMid-Tissue	PostMid	Tissue	4deg	0.0182667
5	Hind-Cont	Hind	Cont	4deg	0.00917839
5	Hind-Tissue	Hind	Tissue	4deg	0.00996142
6	AntMid-Cont	1stMid	Cont	4deg	0.0819653
6	AntMid-Tissue	1stMid	Tissue	4deg	0.192607
6	PostMid-Cont	PostMid	Cont	4deg	0.0234662
6	PostMid-Tissue	PostMid	Tissue	4deg	0.0249468
6	Hind-Cont	Hind	Cont	4deg	0
6	Hind-Tissue	Hind	Tissue	4deg	0
1	AntMid-Cont	1stMid	Cont	95deg	0.0131159
1	AntMid-Tissue	1stMid	Tissue	95deg	0.0124056
1	PostMid-Cont	PostMid	Cont	95deg	0.015916
1	PostMid-Tissue	PostMid	Tissue	95deg	0.0120086
1	Hind-Cont	Hind	Cont	95deg	0.0113918
1	Hind-Tissue	Hind	Tissue	95deg	0.0113484
2	AntMid-Cont	1stMid	Cont	95deg	0.0123395
2	AntMid-Tissue	1stMid	Tissue	95deg	0.00938699
2	PostMid-Cont	PostMid	Cont	95deg	0.0178018
2	PostMid-Tissue	PostMid	Tissue	95deg	0.0104354
2	Hind-Cont	Hind	Cont	95deg	0.0103987
2	Hind-Tissue	Hind	Tissue	95deg	0.0102298
3	AntMid-Cont	1stMid	Cont	95deg	0.010081
3	AntMid-Tissue	1stMid	Tissue	95deg	0
3	PostMid-Cont	PostMid	Cont	95deg	0.0149073
3	PostMid-Tissue	PostMid	Tissue	95deg	0
3	Hind-Cont	Hind	Cont	95deg	0.0098646
3	Hind-Tissue	Hind	Tissue	95deg	0.010458
4	AntMid-Cont	1stMid	Cont	95deg	0
4	AntMid-Tissue	1stMid	Tissue	95deg	0
4	PostMid-Cont	PostMid	Cont	95deg	0.0131061
4	PostMid-Tissue	PostMid	Tissue	95deg	0
4	Hind-Cont	Hind	Cont	95deg	0
4	Hind-Tissue	Hind	Tissue	95deg	0
5	AntMid-Cont	1stMid	Cont	95deg	0.00992834
5	AntMid-Tissue	1stMid	Tissue	95deg	0.00854704
5	PostMid-Cont	PostMid	Cont	95deg	0.0133423
5	PostMid-Tissue	PostMid	Tissue	95deg	0.00795356
5	Hind-Cont	Hind	Cont	95deg	0.00906312
5	Hind-Tissue	Hind	Tissue	95deg	0.00824599
6	AntMid-Cont	1stMid	Cont	95deg	0
6	AntMid-Tissue	1stMid	Tissue	95deg	0
6	PostMid-Cont	PostMid	Cont	95deg	0.0155812
6	PostMid-Tissue	PostMid	Tissue	95deg	0
6	Hind-Cont	Hind	Cont	95deg	0
6	Hind-Tissue	Hind	Tissue	95deg	NA

## Sheet: Figure2C
Treat	Organ	TAG_RelAb	TA_RelAb	TA_GSH_RelAb	TA_Cys_RelAb
L4	Regurgitant	0	0.112982	0.21267	0.253042
L98	Regurgitant	0	0.360899	0.182431	0.431302
L4	Regurgitant	0	0.453575	0.504392	0.420446
L98	Regurgitant	0	0.182858	0.319137	0.425882
L98	Regurgitant	0.00442112	1	1	1
L98	Regurgitant	0	0.0717213	0.0492038	0.366327
L4	Regurgitant	0	0.38011	0.305998	0.646586
L4	Diet	0.663144	0.121828	0	0
L98	Diet	0.60959	0.567927	0	0
L4	Diet	0.895825	0.18408	0	0
L98	Diet	0.476141	0.290066	0	0
L4	Diet	0.728665	0.140147	0	0
L98	Diet	1	0.299409	0	0
L4	Diet	0.76003	0.195463	0	0
L98	Diet	0.187717	0	0	0

## Sheet: Figure2-FigureSupplement1
OriginalGut	Tissue	Solvent	Treat	SolvTreat	TA/TAandTAG
3.1	Content	Cas	0.2	Cas0.2	0.024379
3.1	Content	Cas	0.002	Cas0.002	0.269988
3.1	Content	H2O	RT	H2ORT	0.640041
3.1	Content	Bis	0.2	Bis0.2	0.63307
3.1	Content	Bis	0.002	Bis0.002	0.60515
3.1	Content	H2O	Heat	H2OHeat	0.0460156
5.1	Content	Cas	0.2	Cas0.2	0.02241
5.1	Content	Cas	0.002	Cas0.002	0.13676
1.1	Content	Cas	0.2	Cas0.2	0.0149043
5.1	Content	H2O	RT	H2ORT	0.269328
5.1	Content	Bis	0.2	Bis0.2	0.292916
5.1	Content	Bis	0.002	Bis0.002	0.272288
5.1	Content	H2O	Heat	H2OHeat	0.0365706
7.1	Content	Cas	0.2	Cas0.2	0.0229571
7.1	Content	Cas	0.002	Cas0.002	0.169751
7.1	Content	H2O	RT	H2ORT	0.335324
1.1	Content	Cas	0.002	Cas0.002	0.0430188
7.1	Content	Bis	0.2	Bis0.2	0.36517
7.1	Content	Bis	0.002	Bis0.002	0.35649
7.1	Content	H2O	Heat	H2OHeat	0.0351272
9.1	Content	Cas	0.2	Cas0.2	0.0239911
9.1	Content	Cas	0.002	Cas0.002	0.0969436
9.1	Content	H2O	RT	H2ORT	0.155169
9.1	Content	Bis	0.2	Bis0.2	0.154402
9.1	Content	Bis	0.002	Bis0.002	0.157886
1.1	Content	H2O	RT	H2ORT	0.0687539
9.1	Content	H2O	Heat	H2OHeat	0.0234696
11.1	Content	Cas	0.2	Cas0.2	0.0198756
11.1	Content	Cas	0.002	Cas0.002	0.091965
11.1	Content	H2O	RT	H2ORT	0.170174
11.1	Content	Bis	0.2	Bis0.2	0.172134
11.1	Content	Bis	0.002	Bis0.002	0.167287
11.1	Content	H2O	Heat	H2OHeat	0.0284468
1.1	Content	Bis	0.2	Bis0.2	0.0766155
1.1	Content	Bis	0.002	Bis0.002	0.0757986
1.1	Content	H2O	Heat	H2OHeat	0.0266078
3.2	Tissue	Cas	0.2	Cas0.2	0.0351394
3.2	Tissue	Cas	0.002	Cas0.002	0.07811
3.2	Tissue	H2O	RT	H2ORT	0.125095
3.2	Tissue	Bis	0.2	Bis0.2	0.124826
3.2	Tissue	Bis	0.002	Bis0.002	0.127358
3.2	Tissue	H2O	Heat	H2OHeat	0.0323252
5.2	Tissue	Cas	0.2	Cas0.2	0.0289138
5.2	Tissue	Cas	0.002	Cas0.002	0.0613292
1.2	Tissue	Cas	0.2	Cas0.2	0.0428485
5.2	Tissue	H2O	RT	H2ORT	0.0763141
5.2	Tissue	Bis	0.2	Bis0.2	0.0859563
5.2	Tissue	Bis	0.002	Bis0.002	0.0800629
5.2	Tissue	H2O	Heat	H2OHeat	0.0268662
7.2	Tissue	Cas	0.2	Cas0.2	0.0443986
7.2	Tissue	Cas	0.002	Cas0.002	0.0648999
7.2	Tissue	H2O	RT	H2ORT	0.0949129
1.2	Tissue	Cas	0.002	Cas0.002	0.0858755
7.2	Tissue	Bis	0.2	Bis0.2	0.0997722
7.2	Tissue	Bis	0.002	Bis0.002	0.0985471
7.2	Tissue	H2O	Heat	H2OHeat	0.0224042
9.2	Tissue	Cas	0.2	Cas0.2	0.0198513
9.2	Tissue	Cas	0.002	Cas0.002	0.0507892
9.2	Tissue	H2O	RT	H2ORT	0.0695172
9.2	Tissue	Bis	0.2	Bis0.2	0.0698563
9.2	Tissue	Bis	0.002	Bis0.002	0.0812854
1.2	Tissue	H2O	RT	H2ORT	0.10879
9.2	Tissue	H2O	Heat	H2OHeat	0.0170845
11.2	Tissue	Cas	0.2	Cas0.2	0.0368604
11.2	Tissue	Cas	0.002	Cas0.002	0.0923766
11.2	Tissue	H2O	RT	H2ORT	0.137999
11.2	Tissue	Bis	0.2	Bis0.2	0.145787
11.2	Tissue	Bis	0.002	Bis0.002	0.13668
11.2	Tissue	H2O	Heat	H2OHeat	0.0217609
1.2	Tissue	Bis	0.2	Bis0.2	0.105945
1.2	Tissue	Bis	0.002	Bis0.002	0.10777
1.2	Tissue	H2O	Heat	H2OHeat	0.0360053

## Sheet: Figure2-FigureSupplement2
Inhibitor	Concentration(ug/ml)	TA/TAandTAG
Cas	0.002	0.0247298
Cas	0.2	0.00695416
Cas	20	0.00576141
Acar	0.002	0.0158398
Acar	0.2	0.0323992
Acar	20	0.0277602
Cas	0.002	0.323384
Cas	0.2	0.0161107
Cas	20	0.00707631
Acar	0.002	0.292844
Acar	0.2	0.303987
Acar	20	0.233352
Cas	0.002	0.0401859
Cas	0.2	0.00950169
Cas	20	0.00738807
Acar	0.002	0.0248359
Acar	0.2	0.0311902
Acar	20	0.036483
