# Supplementary material for: A beta-glucosidase of an insect herbivore determines both toxicity and deterrence of a dandelion defense metabolite
Source: eLife. 2021 Oct 11;10:e68642. doi: 10.7554/eLife.68642 (PMC8504966; doi:10.7554/eLife.68642)
Supplement: Figure 3—source data 1. [file elife-68642-fig3-data1.xlsx]

## Sheet: Figure3B
gene_id	A_AntH2O	G_AntH2O	M_AntH2O	C_AntTAG	I_AntTAG	O_AntTAG	E_AntLatex	K_AntLatex	Q_AntLatex	B_PostH2O	H_PostH2O	N_PostH2O	D_PostTAG	J_PostTAG	P_PostTAG	F_PostLatex	L_PostLatex	R_PostLatex
Mm_Gluc3	344.2	774.95	293.86	442.2	116.85	587.79	375.99	119.33	137.72	4.44	3.51	1.84	2.41	1.05	1.94	0.81	0.73	0.79
Mm_Gluc2	1223.12	1346.87	859.49	2317.35	831.88	1472.04	1945.18	1815.28	1836.31	4.49	5.66	6.12	7.74	8.19	4.87	4.06	4.71	5.28
Mm_Gluc1	360.07	174.97	344.96	343.51	152.04	468.08	49.02	395.88	170.07	1.19	0.7	0.68	0.85	0.68	1.78	0.23	1.08	0.55
Mm_Gluc17	400.83	1526.62	1073.94	1048.6	601.07	2637.88	1281.7	598.9	372.32	4.68	10.55	8.87	8.65	13.54	8.63	4.49	3.86	2.55
Mm_Gluc18	182	148.67	33.41	136.99	55.4	192.01	162.54	133.56	39.55	2.94	3.37	3.69	2.19	3.68	3.28	4.7	3.7	1.61
Mm_Gluc16	559.57	594.22	656.09	506.77	411.85	508.59	206.58	260.22	808.39	6.12	1.72	25.87	3.71	5.07	2.94	0.75	1.36	2.96
Mm_Gluc15	301.35	667.29	343.75	567.46	466.47	776.12	982.05	625.63	374.16	21.17	2.53	14.13	11	14.46	10.3	2.02	10.64	11.59
Mm_Gluc19v	291.61	330.79	472.95	246.09	224.22	641.75	566.25	458.3	397.51	1.22	1.44	3.93	3.08	4.58	3.09	1.48	3.45	2.75
Mm_Gluc6	1084.15	1108.55	1040.84	919.4	718.57	1026.46	1243.89	682.83	587.01	2.59	3.37	4.44	3.58	5.05	3.32	1.88	1.67	1.4
Mm_Gluc14	873.24	2174.55	3626.87	1936.71	2245.73	1935.11	3891.63	642.91	1393.52	4.05	6.95	24.57	7.42	17.95	5.67	3.96	3.27	5.44
Mm_Gluc11	140.17	134.74	179.15	141.22	99.85	130.41	131.7	115.34	85.45	2.91	0.24	1.5	0.74	0.28	0.57	0.16	0.23	0.7
Mm_Gluc5	2631.25	2370.15	2642.53	2081.26	1555.28	1915.59	2611.35	1202.29	1330.22	8.36	11.63	16.1	7.44	12.72	6.59	3.7	4.65	4.9

## Sheet: Figure3-FigureSupplement2and4
Glycoside	MetaboliteAnalyzed	TimeAfterIncubation	DateAssay	Gene	PeakAreaMetabolite
TA-G	TA	10 s	Assay1	1	480.174
TA-G	TA	10 s	Assay1	2	19.3907
TA-G	TA	10 s	Assay1	3	0
TA-G	TA	10 s	Assay1	5	0
TA-G	TA	10 s	Assay1	6	25.4745
TA-G	TA	10 s	Assay1	11	0
TA-G	TA	10 s	Assay1	14	0
TA-G	TA	10 s	Assay1	15	21.1944
TA-G	TA	10 s	Assay1	16	751.9
TA-G	TA	10 s	Assay1	17	2375.46
TA-G	TA	10 s	Assay1	18	0
TA-G	TA	10 s	Assay1	19	0
TA-G	TA	10 s	Assay1	CAT	0
TA-G	TA	10 s	Assay1	GFP	n.a.
TA-G	TA	10 s	Assay1	wt	0
TA-G	TA	10 s	Assay1	Puffer	0
TA-G	TA	10 s	Assay3	1	208.079
TA-G	TA	10 s	Assay3	2	16.551
TA-G	TA	10 s	Assay3	3	0
TA-G	TA	10 s	Assay3	5	0
TA-G	TA	10 s	Assay3	6	0
TA-G	TA	10 s	Assay3	11	0
TA-G	TA	10 s	Assay3	14	0
TA-G	TA	10 s	Assay3	15	16.7009
TA-G	TA	10 s	Assay3	16	731.897
TA-G	TA	10 s	Assay3	17	2476.59
TA-G	TA	10 s	Assay3	18	0
TA-G	TA	10 s	Assay3	19	0
TA-G	TA	10 s	Assay3	CAT	0
TA-G	TA	10 s	Assay3	GFP	0
TA-G	TA	10 s	Assay3	wt	0
TA-G	TA	10 s	Assay3	Puffer	0
BXDs	MBOA	24 h	Assay1	1	142000
BXDs	MBOA	24 h	Assay1	2	3280
BXDs	MBOA	24 h	Assay1	3	13700
BXDs	MBOA	24 h	Assay1	5	3340
BXDs	MBOA	24 h	Assay1	6	32500
BXDs	MBOA	24 h	Assay1	11	4730
BXDs	MBOA	24 h	Assay1	14	5680
BXDs	MBOA	24 h	Assay1	15	6090
BXDs	MBOA	24 h	Assay1	16	9210
BXDs	MBOA	24 h	Assay1	17	208000
BXDs	MBOA	24 h	Assay1	18	194000
BXDs	MBOA	24 h	Assay1	19	4040
BXDs	MBOA	24 h	Assay1	CAT	3530
BXDs	MBOA	24 h	Assay1	GFP	3850
BXDs	MBOA	24 h	Assay1	wt	4600
BXDs	MBOA	24 h	Assay1	Puffer	7790
BXDs	MBOA	24 h	Assay2	1	67400
BXDs	MBOA	24 h	Assay2	2	4130
BXDs	MBOA	24 h	Assay2	3	18200
BXDs	MBOA	24 h	Assay2	5	3520
BXDs	MBOA	24 h	Assay2	6	22700
BXDs	MBOA	24 h	Assay2	11	4320
BXDs	MBOA	24 h	Assay2	14	3750
BXDs	MBOA	24 h	Assay2	15	5450
BXDs	MBOA	24 h	Assay2	16	5580
BXDs	MBOA	24 h	Assay2	17	223000
BXDs	MBOA	24 h	Assay2	18	127000
BXDs	MBOA	24 h	Assay2	19	3120
BXDs	MBOA	24 h	Assay2	CAT	4230
BXDs	MBOA	24 h	Assay2	GFP	4350
BXDs	MBOA	24 h	Assay2	wt	4640
BXDs	MBOA	24 h	Assay2	Puffer	2020
BXDs	MBOA	24 h	Assay3	1	195000
BXDs	MBOA	24 h	Assay3	2	4160
BXDs	MBOA	24 h	Assay3	3	26100
BXDs	MBOA	24 h	Assay3	5	7030
BXDs	MBOA	24 h	Assay3	6	37300
BXDs	MBOA	24 h	Assay3	11	7190
BXDs	MBOA	24 h	Assay3	14	3820
BXDs	MBOA	24 h	Assay3	15	9180
BXDs	MBOA	24 h	Assay3	16	9330
BXDs	MBOA	24 h	Assay3	17	205000
BXDs	MBOA	24 h	Assay3	18	189000
BXDs	MBOA	24 h	Assay3	19	4980
BXDs	MBOA	24 h	Assay3	CAT	5770
BXDs	MBOA	24 h	Assay3	GFP	4510
BXDs	MBOA	24 h	Assay3	wt	5930
BXDs	MBOA	24 h	Assay3	Puffer	7550
Salicin	Salicylalcohol	24 h	Assay1	1	161.838
Salicin	Salicylalcohol	24 h	Assay1	2	47.3884
Salicin	Salicylalcohol	24 h	Assay1	3	100.497
Salicin	Salicylalcohol	24 h	Assay1	5	20.6486
Salicin	Salicylalcohol	24 h	Assay1	6	64.9531
Salicin	Salicylalcohol	24 h	Assay1	11	77.9749
Salicin	Salicylalcohol	24 h	Assay1	14	176.499
Salicin	Salicylalcohol	24 h	Assay1	15	370.214
Salicin	Salicylalcohol	24 h	Assay1	16	104.26
Salicin	Salicylalcohol	24 h	Assay1	17	968.873
Salicin	Salicylalcohol	24 h	Assay1	18	350.732
Salicin	Salicylalcohol	24 h	Assay1	19	26.6805
Salicin	Salicylalcohol	24 h	Assay1	CAT	9.30666
Salicin	Salicylalcohol	24 h	Assay1	GFP	14.0173
Salicin	Salicylalcohol	24 h	Assay1	wt	14.9504
Salicin	Salicylalcohol	24 h	Assay1	Puffer	0
Salicin	Salicylalcohol	24 h	Assay2	1	66.3104
Salicin	Salicylalcohol	24 h	Assay2	2	77.9415
Salicin	Salicylalcohol	24 h	Assay2	3	56.0493
Salicin	Salicylalcohol	24 h	Assay2	5	8.55133
Salicin	Salicylalcohol	24 h	Assay2	6	71.4188
Salicin	Salicylalcohol	24 h	Assay2	11	9.57259
Salicin	Salicylalcohol	24 h	Assay2	14	173.582
Salicin	Salicylalcohol	24 h	Assay2	15	1408.43
Salicin	Salicylalcohol	24 h	Assay2	16	1088.09
Salicin	Salicylalcohol	24 h	Assay2	17	103.595
Salicin	Salicylalcohol	24 h	Assay2	18	1537.85
Salicin	Salicylalcohol	24 h	Assay2	19	12.5296
Salicin	Salicylalcohol	24 h	Assay2	CAT	3.32068
Salicin	Salicylalcohol	24 h	Assay2	GFP	9.26548
Salicin	Salicylalcohol	24 h	Assay2	wt	9.98472
Salicin	Salicylalcohol	24 h	Assay2	Puffer	0
Salicin	Salicylalcohol	24 h	Assay3	1	186.634
Salicin	Salicylalcohol	24 h	Assay3	2	103.987
Salicin	Salicylalcohol	24 h	Assay3	3	76.8009
Salicin	Salicylalcohol	24 h	Assay3	5	21.8247
Salicin	Salicylalcohol	24 h	Assay3	6	146.704
Salicin	Salicylalcohol	24 h	Assay3	11	10.354
Salicin	Salicylalcohol	24 h	Assay3	14	178.848
Salicin	Salicylalcohol	24 h	Assay3	15	974.626
Salicin	Salicylalcohol	24 h	Assay3	16	97.5191
Salicin	Salicylalcohol	24 h	Assay3	17	1439.14
Salicin	Salicylalcohol	24 h	Assay3	18	1681.12
Salicin	Salicylalcohol	24 h	Assay3	19	13.623
Salicin	Salicylalcohol	24 h	Assay3	CAT	8.332
Salicin	Salicylalcohol	24 h	Assay3	GFP	10.7619
Salicin	Salicylalcohol	24 h	Assay3	wt	9.5909
Salicin	Salicylalcohol	24 h	Assay3	Puffer	0
4-MSOB	4-MSOB-ITC	24 h	Assay1	1	2880
4-MSOB	4-MSOB-ITC	24 h	Assay1	2	857
4-MSOB	4-MSOB-ITC	24 h	Assay1	3	39500
4-MSOB	4-MSOB-ITC	24 h	Assay1	5	1100
4-MSOB	4-MSOB-ITC	24 h	Assay1	6	65300
4-MSOB	4-MSOB-ITC	24 h	Assay1	11	858
4-MSOB	4-MSOB-ITC	24 h	Assay1	14	253000
4-MSOB	4-MSOB-ITC	24 h	Assay1	15	4310
4-MSOB	4-MSOB-ITC	24 h	Assay1	16	2750
4-MSOB	4-MSOB-ITC	24 h	Assay1	17	2250
4-MSOB	4-MSOB-ITC	24 h	Assay1	18	912
4-MSOB	4-MSOB-ITC	24 h	Assay1	19	1040
4-MSOB	4-MSOB-ITC	24 h	Assay1	CAT	1020
4-MSOB	4-MSOB-ITC	24 h	Assay1	GFP	1050
4-MSOB	4-MSOB-ITC	24 h	Assay1	wt	789
4-MSOB	4-MSOB-ITC	24 h	Assay1	Puffer	2520
4-MSOB	4-MSOB-ITC	24 h	Assay2	1	1370
4-MSOB	4-MSOB-ITC	24 h	Assay2	2	595
4-MSOB	4-MSOB-ITC	24 h	Assay2	3	40900
4-MSOB	4-MSOB-ITC	24 h	Assay2	5	1030
4-MSOB	4-MSOB-ITC	24 h	Assay2	6	46600
4-MSOB	4-MSOB-ITC	24 h	Assay2	11	805
4-MSOB	4-MSOB-ITC	24 h	Assay2	14	113000
4-MSOB	4-MSOB-ITC	24 h	Assay2	15	2180
4-MSOB	4-MSOB-ITC	24 h	Assay2	16	1880
4-MSOB	4-MSOB-ITC	24 h	Assay2	17	1190
4-MSOB	4-MSOB-ITC	24 h	Assay2	18	666
4-MSOB	4-MSOB-ITC	24 h	Assay2	19	723
4-MSOB	4-MSOB-ITC	24 h	Assay2	CAT	1080
4-MSOB	4-MSOB-ITC	24 h	Assay2	GFP	873
4-MSOB	4-MSOB-ITC	24 h	Assay2	wt	846
4-MSOB	4-MSOB-ITC	24 h	Assay2	Puffer	1870
4-MSOB	4-MSOB-ITC	24 h	Assay3	1	1750
4-MSOB	4-MSOB-ITC	24 h	Assay3	2	192
4-MSOB	4-MSOB-ITC	24 h	Assay3	3	36100
4-MSOB	4-MSOB-ITC	24 h	Assay3	5	206
4-MSOB	4-MSOB-ITC	24 h	Assay3	6	35700
4-MSOB	4-MSOB-ITC	24 h	Assay3	11	310
4-MSOB	4-MSOB-ITC	24 h	Assay3	14	56900
4-MSOB	4-MSOB-ITC	24 h	Assay3	15	2090
4-MSOB	4-MSOB-ITC	24 h	Assay3	16	988
4-MSOB	4-MSOB-ITC	24 h	Assay3	17	697
4-MSOB	4-MSOB-ITC	24 h	Assay3	18	268
4-MSOB	4-MSOB-ITC	24 h	Assay3	19	840
4-MSOB	4-MSOB-ITC	24 h	Assay3	CAT	326
4-MSOB	4-MSOB-ITC	24 h	Assay3	GFP	457
4-MSOB	4-MSOB-ITC	24 h	Assay3	wt	423
4-MSOB	4-MSOB-ITC	24 h	Assay3	Puffer	1500
Cellobiose	Cellobiose	24 h	Assay1	1	2580000
Cellobiose	Cellobiose	24 h	Assay1	2	4590000
Cellobiose	Cellobiose	24 h	Assay1	3	3760000
Cellobiose	Cellobiose	24 h	Assay1	5	4670000
Cellobiose	Cellobiose	24 h	Assay1	6	1960000
Cellobiose	Cellobiose	24 h	Assay1	11	4690000
Cellobiose	Cellobiose	24 h	Assay1	14	4660000
Cellobiose	Cellobiose	24 h	Assay1	15	1790
Cellobiose	Cellobiose	24 h	Assay1	16	5120000
Cellobiose	Cellobiose	24 h	Assay1	17	621
Cellobiose	Cellobiose	24 h	Assay1	18	2300000
Cellobiose	Cellobiose	24 h	Assay1	19	4550000
Cellobiose	Cellobiose	24 h	Assay1	CAT	4970000
Cellobiose	Cellobiose	24 h	Assay1	GFP	5140000
Cellobiose	Cellobiose	24 h	Assay1	wt	3740000
Cellobiose	Cellobiose	24 h	Assay1	Puffer	6570000
Cellobiose	Cellobiose	24 h	Assay2	1	5730000
Cellobiose	Cellobiose	24 h	Assay2	2	5200000
Cellobiose	Cellobiose	24 h	Assay2	3	7020000
Cellobiose	Cellobiose	24 h	Assay2	5	4460000
Cellobiose	Cellobiose	24 h	Assay2	6	5800000
Cellobiose	Cellobiose	24 h	Assay2	11	6460000
Cellobiose	Cellobiose	24 h	Assay2	14	5590000
Cellobiose	Cellobiose	24 h	Assay2	15	72.9
Cellobiose	Cellobiose	24 h	Assay2	16	3400000
Cellobiose	Cellobiose	24 h	Assay2	17	336000
Cellobiose	Cellobiose	24 h	Assay2	18	5170000
Cellobiose	Cellobiose	24 h	Assay2	19	5050000
Cellobiose	Cellobiose	24 h	Assay2	CAT	1630000
Cellobiose	Cellobiose	24 h	Assay2	GFP	5960000
Cellobiose	Cellobiose	24 h	Assay2	wt	6840000
Cellobiose	Cellobiose	24 h	Assay2	Puffer	3870000
Cellobiose	Cellobiose	24 h	Assay3	1	3200000
Cellobiose	Cellobiose	24 h	Assay3	2	4290000
Cellobiose	Cellobiose	24 h	Assay3	3	5460000
Cellobiose	Cellobiose	24 h	Assay3	5	5290000
Cellobiose	Cellobiose	24 h	Assay3	6	4980000
Cellobiose	Cellobiose	24 h	Assay3	11	6230000
Cellobiose	Cellobiose	24 h	Assay3	14	4860000
Cellobiose	Cellobiose	24 h	Assay3	15	368
Cellobiose	Cellobiose	24 h	Assay3	16	4500000
Cellobiose	Cellobiose	24 h	Assay3	17	181
Cellobiose	Cellobiose	24 h	Assay3	18	5180000
Cellobiose	Cellobiose	24 h	Assay3	19	4520000
Cellobiose	Cellobiose	24 h	Assay3	CAT	4760000
Cellobiose	Cellobiose	24 h	Assay3	GFP	4690000
Cellobiose	Cellobiose	24 h	Assay3	wt	4800000
Cellobiose	Cellobiose	24 h	Assay3	Puffer	2370000
Fluorescence	Fluorescence	24 h	Assay1	1	high
Fluorescence	Fluorescence	24 h	Assay1	2	high
Fluorescence	Fluorescence	24 h	Assay1	3	high
Fluorescence	Fluorescence	24 h	Assay1	5	low
Fluorescence	Fluorescence	24 h	Assay1	6	high
Fluorescence	Fluorescence	24 h	Assay1	11	low
Fluorescence	Fluorescence	24 h	Assay1	14	medium
Fluorescence	Fluorescence	24 h	Assay1	15	high
Fluorescence	Fluorescence	24 h	Assay1	16	medium
Fluorescence	Fluorescence	24 h	Assay1	17	high
Fluorescence	Fluorescence	24 h	Assay1	18	high
Fluorescence	Fluorescence	24 h	Assay1	19	medium
Fluorescence	Fluorescence	24 h	Assay1	CAT	low
Fluorescence	Fluorescence	24 h	Assay1	GFP	low
Fluorescence	Fluorescence	24 h	Assay1	wt	low
Fluorescence	Fluorescence	24 h	Assay1	Puffer	very low
Fluorescence	Fluorescence	24 h	Assay2	1	high
Fluorescence	Fluorescence	24 h	Assay2	2	high
Fluorescence	Fluorescence	24 h	Assay2	3	high
Fluorescence	Fluorescence	24 h	Assay2	5	low
Fluorescence	Fluorescence	24 h	Assay2	6	high
Fluorescence	Fluorescence	24 h	Assay2	11	low
Fluorescence	Fluorescence	24 h	Assay2	14	medium
Fluorescence	Fluorescence	24 h	Assay2	15	high
Fluorescence	Fluorescence	24 h	Assay2	16	medium
Fluorescence	Fluorescence	24 h	Assay2	17	high
Fluorescence	Fluorescence	24 h	Assay2	18	high
Fluorescence	Fluorescence	24 h	Assay2	19	low
Fluorescence	Fluorescence	24 h	Assay2	CAT	low
Fluorescence	Fluorescence	24 h	Assay2	GFP	low
Fluorescence	Fluorescence	24 h	Assay2	wt	low
Fluorescence	Fluorescence	24 h	Assay2	Puffer	very low
Fluorescence	Fluorescence	24 h	Assay3	1	high
Fluorescence	Fluorescence	24 h	Assay3	2	high
Fluorescence	Fluorescence	24 h	Assay3	3	high
Fluorescence	Fluorescence	24 h	Assay3	5	medium
Fluorescence	Fluorescence	24 h	Assay3	6	high
Fluorescence	Fluorescence	24 h	Assay3	11	medium
Fluorescence	Fluorescence	24 h	Assay3	14	medium
Fluorescence	Fluorescence	24 h	Assay3	15	high
Fluorescence	Fluorescence	24 h	Assay3	16	high
Fluorescence	Fluorescence	24 h	Assay3	17	medium
Fluorescence	Fluorescence	24 h	Assay3	18	high
Fluorescence	Fluorescence	24 h	Assay3	19	low
Fluorescence	Fluorescence	24 h	Assay3	CAT	low
Fluorescence	Fluorescence	24 h	Assay3	GFP	low
Fluorescence	Fluorescence	24 h	Assay3	wt	low
Fluorescence	Fluorescence	24 h	Assay3	Puffer	very low

## Sheet: Figure3-FigureSupplement3
Melolontha	Treatment	Gut	Aglycone	PeakArea	RelativeAct(PeakArea/MaxPeakArea)
1	boiled	content	4MSOB-ITC	760	0.0300395
2	boiled	content	4MSOB-ITC	725	0.0286561
3	boiled	content	4MSOB-ITC	641	0.025336
4	boiled	content	4MSOB-ITC	677	0.0267589
5	boiled	content	4MSOB-ITC	500	0.0197628
7	boiled	content	4MSOB-ITC	385	0.0152174
8	boiled	content	4MSOB-ITC	801	0.0316601
9	boiled	content	4MSOB-ITC	777	0.0307115
10	boiled	content	4MSOB-ITC	774	0.0305929
1	nonboiled	content	4MSOB-ITC	6670	0.263636
2	nonboiled	content	4MSOB-ITC	9400	0.371542
3	nonboiled	content	4MSOB-ITC	25300	1
4	nonboiled	content	4MSOB-ITC	1220	0.0482213
5	nonboiled	content	4MSOB-ITC	4020	0.158893
7	nonboiled	content	4MSOB-ITC	10600	0.418972
8	nonboiled	content	4MSOB-ITC	5050	0.199605
9	nonboiled	content	4MSOB-ITC	4430	0.175099
10	nonboiled	content	4MSOB-ITC	1050	0.041502
1	boiled	tissue	4MSOB-ITC	686	0.0331401
2	boiled	tissue	4MSOB-ITC	562	0.0271498
3	boiled	tissue	4MSOB-ITC	551	0.0266184
4	boiled	tissue	4MSOB-ITC	672	0.0324638
5	boiled	tissue	4MSOB-ITC	659	0.0318357
7	boiled	tissue	4MSOB-ITC	305	0.0147343
8	boiled	tissue	4MSOB-ITC	590	0.0285024
9	boiled	tissue	4MSOB-ITC	607	0.0293237
10	boiled	tissue	4MSOB-ITC	611	0.0295169
1	nonboiled	tissue	4MSOB-ITC	20700	1
2	nonboiled	tissue	4MSOB-ITC	16100	0.777778
3	nonboiled	tissue	4MSOB-ITC	16400	0.792271
4	nonboiled	tissue	4MSOB-ITC	5260	0.254106
5	nonboiled	tissue	4MSOB-ITC	16500	0.797101
7	nonboiled	tissue	4MSOB-ITC	13800	0.666667
8	nonboiled	tissue	4MSOB-ITC	12300	0.594203
9	nonboiled	tissue	4MSOB-ITC	10600	0.512077
10	nonboiled	tissue	4MSOB-ITC	1350	0.0652174
1	boiled	content	DIMBOA-II	220	0.00152778
2	boiled	content	DIMBOA-II	347	0.00240972
3	boiled	content	DIMBOA-II	978	0.00679167
4	boiled	content	DIMBOA-II	978	0.00679167
5	boiled	content	DIMBOA-II	567	0.0039375
7	boiled	content	DIMBOA-II	599	0.00415972
8	boiled	content	DIMBOA-II	536	0.00372222
9	boiled	content	DIMBOA-II	599	0.00415972
10	boiled	content	DIMBOA-II	599	0.00415972
1	nonboiled	content	DIMBOA-II	22800	0.158333
2	nonboiled	content	DIMBOA-II	63500	0.440972
3	nonboiled	content	DIMBOA-II	144000	1
4	nonboiled	content	DIMBOA-II	2870	0.0199306
5	nonboiled	content	DIMBOA-II	54000	0.375
7	nonboiled	content	DIMBOA-II	27000	0.1875
8	nonboiled	content	DIMBOA-II	31900	0.221528
9	nonboiled	content	DIMBOA-II	28100	0.195139
10	nonboiled	content	DIMBOA-II	551	0.00382639
1	boiled	tissue	DIMBOA-II	505	0.000930018
2	boiled	tissue	DIMBOA-II	379	0.000697974
3	boiled	tissue	DIMBOA-II	378	0.000696133
4	boiled	tissue	DIMBOA-II	410	0.000755064
5	boiled	tissue	DIMBOA-II	221	0.000406998
7	boiled	tissue	DIMBOA-II	442	0.000813996
8	boiled	tissue	DIMBOA-II	189	0.000348066
9	boiled	tissue	DIMBOA-II	403	0.000742173
10	boiled	tissue	DIMBOA-II	347	0.000639042
1	nonboiled	tissue	DIMBOA-II	241000	0.443831
2	nonboiled	tissue	DIMBOA-II	347000	0.639042
3	nonboiled	tissue	DIMBOA-II	543000	1
4	nonboiled	tissue	DIMBOA-II	138000	0.254144
5	nonboiled	tissue	DIMBOA-II	163000	0.300184
7	nonboiled	tissue	DIMBOA-II	80300	0.147882
8	nonboiled	tissue	DIMBOA-II	54200	0.0998158
9	nonboiled	tissue	DIMBOA-II	275000	0.506446
10	nonboiled	tissue	DIMBOA-II	2140	0.00394107
1	boiled	content	Salicylalcohol	35.3392	0.501996
2	boiled	content	Salicylalcohol	20.6212	0.292927
3	boiled	content	Salicylalcohol	13.8721	0.197054
4	boiled	content	Salicylalcohol	6.15247	0.0873964
5	boiled	content	Salicylalcohol	6.35378	0.090256
7	boiled	content	Salicylalcohol	15.0892	0.214343
8	boiled	content	Salicylalcohol	20.6127	0.292806
9	boiled	content	Salicylalcohol	11.5382	0.163901
10	boiled	content	Salicylalcohol	11.2693	0.160081
1	nonboiled	content	Salicylalcohol	32.3844	0.460024
2	nonboiled	content	Salicylalcohol	70.3973	1
3	nonboiled	content	Salicylalcohol	51.2104	0.727448
4	nonboiled	content	Salicylalcohol	6.07441	0.0862875
5	nonboiled	content	Salicylalcohol	22.0641	0.313423
7	nonboiled	content	Salicylalcohol	33.3762	0.474111
8	nonboiled	content	Salicylalcohol	39.726	0.564311
9	nonboiled	content	Salicylalcohol	57.0146	0.809898
10	nonboiled	content	Salicylalcohol	2.70448	0.0384174
1	boiled	tissue	Salicylalcohol	7.44523	0.0290438
2	boiled	tissue	Salicylalcohol	4.00203	0.0156119
3	boiled	tissue	Salicylalcohol	3.01671	0.0117682
4	boiled	tissue	Salicylalcohol	1.10359	0.00430511
5	boiled	tissue	Salicylalcohol	1.80522	0.00704216
7	boiled	tissue	Salicylalcohol	6.92615	0.0270189
8	boiled	tissue	Salicylalcohol	2.90605	0.0113365
9	boiled	tissue	Salicylalcohol	2.26648	0.00884154
10	boiled	tissue	Salicylalcohol	1.83562	0.00716075
1	nonboiled	tissue	Salicylalcohol	192.775	0.752014
2	nonboiled	tissue	Salicylalcohol	186.113	0.726029
3	nonboiled	tissue	Salicylalcohol	256.344	1
4	nonboiled	tissue	Salicylalcohol	123.966	0.483591
5	nonboiled	tissue	Salicylalcohol	185.748	0.724604
7	nonboiled	tissue	Salicylalcohol	146.692	0.572247
8	nonboiled	tissue	Salicylalcohol	84.7317	0.330538
9	nonboiled	tissue	Salicylalcohol	218.176	0.851106
10	nonboiled	tissue	Salicylalcohol	57.1122	0.222795
