# Supplementary material for: A beta-glucosidase of an insect herbivore determines both toxicity and deterrence of a dandelion defense metabolite
Source: eLife. 2021 Oct 11;10:e68642. doi: 10.7554/eLife.68642 (PMC8504966; doi:10.7554/eLife.68642)
Supplement: Figure 4—source data 1. [file elife-68642-fig4-data1.xlsx]

## Sheet: Figure4A
SeqNr	SilencedGene	NormalizedActivity
1	GFP	0.00625041
2	GFP	0.00546071
3	GFP	0.00557934
4	GFP	0.00376787
5	GFP	0.00621454
6	GFP	0.00185072
7	GFP	0.0119603
8	GFP	0.00385881
9	GFP	0.00201146
10	16	0.000930368
11	16	0.00371031
12	16	0.0050466
13	16	0.00377217
14	16	0.00430351
15	16	0.00409229
16	16	0.00356806
17	16	0.00102172
18	16	0.00447185
19	17	0.00105085
20	17	-0.000446189
21	17	-0.000751507
22	17	0.00141647
23	17	0.00214328
24	17	0.00308489
25	17	0.00214026
26	17	0.00118307
27	17	0.00132748
28	18	0.00407097
29	18	0.00379493
30	18	0.00371717
31	18	0.00758645
32	18	0.00389377
33	18	0.00262637
34	18	0.00197959
35	18	0.00257541
36	18	0.00543084
37	18	0.00246988
38	16_17	0.00306635
39	16_17	0.00299109
40	16_17	0.00144941
41	16_17	0.00127781
42	16_17	0.000134168
43	16_17	-0.000385135
44	16_17	-8.53e-05
45	16_17	0.00177555
46	16_17	0.00242346
47	16_17	-0.000462596

## Sheet: Figure4B_C&Figure4-FigureSup4
Arena	Combination	Plant_1	Plant_2	RNAi	Treat	Mass.diff.mg	GlcAct
1	DA1DA1	DA1	DA1	GFP	DA1DA1_GFP	258.3	0.22204
2	DA1DA1	DA1	DA1	Glucosidase	DA1DA1_Glucosidase	-20.3	0.0392514
3	DA1DA1	DA1	DA1	GFP	DA1DA1_GFP	51	0.353281
4	DA1DA1	DA1	DA1	Glucosidase	DA1DA1_Glucosidase	-4.6	0.015941
5	DA1DA1	DA1	DA1	GFP	DA1DA1_GFP	-117	0.058675
6	DA1DA1	DA1	DA1	Glucosidase	DA1DA1_Glucosidase	364.6	0.0927113
7	DA1DA1	DA1	DA1	GFP	DA1DA1_GFP	36.4	1.13989
8	DA1DA1	DA1	DA1	Glucosidase	DA1DA1_Glucosidase	-98.3	NA
9	DA1DA1	DA1	DA1	GFP	DA1DA1_GFP	-35.8	8.50841
10	DA1DA1	DA1	DA1	Glucosidase	DA1DA1_Glucosidase	13.6	0.341247
11	DA1DA1	DA1	DA1	GFP	DA1DA1_GFP	84.1	0.746849
12	DA1DA1	DA1	DA1	Glucosidase	DA1DA1_Glucosidase	158.6	0.0376525
13	DA1DA1	DA1	DA1	GFP	DA1DA1_GFP	77.9	3.13592
14	DA1DA1	DA1	DA1	Glucosidase	DA1DA1_Glucosidase	NA	NA
15	DA1DA1	DA1	DA1	GFP	DA1DA1_GFP	-114.8	0.0543675
16	DA1DA1	DA1	DA1	Glucosidase	DA1DA1_Glucosidase	-194.6	0.0655568
17	DA1DA1	DA1	DA1	GFP	DA1DA1_GFP	-75.6	0.0883203
18	DA1DA1	DA1	DA1	Glucosidase	DA1DA1_Glucosidase	-98	0.0812713
19	DA1DA1	DA1	DA1	GFP	DA1DA1_GFP	-209.2	0.857904
20	DA1DA1	DA1	DA1	Glucosidase	DA1DA1_Glucosidase	254.3	0.0697767
21	DA1DA1	DA1	DA1	GFP	DA1DA1_GFP	-220.4	0.165958
22	DA1DA1	DA1	DA1	Glucosidase	DA1DA1_Glucosidase	NA	NA
23	DA1DA1	DA1	DA1	GFP	DA1DA1_GFP	-98.5	0.0305833
24	DA1DA1	DA1	DA1	Glucosidase	DA1DA1_Glucosidase	15.8	0.0807099
25	DA1DA1	DA1	DA1	GFP	DA1DA1_GFP	143.3	40.473
26	DA1DA1	DA1	DA1	Glucosidase	DA1DA1_Glucosidase	7.5	2.4434
27	DA1DA1	DA1	DA1	GFP	DA1DA1_GFP	75.9	NA
28	DA1DA1	DA1	DA1	Glucosidase	DA1DA1_Glucosidase	264.6	0.0853118
29	DA1DA1	DA1	DA1	GFP	DA1DA1_GFP	-87	0.566006
30	DA1DA1	DA1	DA1	Glucosidase	DA1DA1_Glucosidase	125.3	0.531775
31	DA15DA15	DA15	DA15	GFP	DA15DA15_GFP	322.2	39.3663
32	DA15DA15	DA15	DA15	Glucosidase	DA15DA15_Glucosidase	-65.1	0.0287337
33	DA15DA15	DA15	DA15	GFP	DA15DA15_GFP	33.8	5.69182
34	DA15DA15	DA15	DA15	Glucosidase	DA15DA15_Glucosidase	-157	0.0853118
35	DA15DA15	DA15	DA15	GFP	DA15DA15_GFP	50.6	0.191961
36	DA15DA15	DA15	DA15	Glucosidase	DA15DA15_Glucosidase	-125.4	0.0204591
37	DA15DA15	DA15	DA15	GFP	DA15DA15_GFP	87.3	6.62945
38	DA15DA15	DA15	DA15	Glucosidase	DA15DA15_Glucosidase	66.8	0.0901761
39	DA15DA15	DA15	DA15	GFP	DA15DA15_GFP	50.8	6.95904
40	DA15DA15	DA15	DA15	Glucosidase	DA15DA15_Glucosidase	35.7	1.35556
41	DA15DA15	DA15	DA15	GFP	DA15DA15_GFP	NA	0.128415
42	DA15DA15	DA15	DA15	Glucosidase	DA15DA15_Glucosidase	-177.7	0.104306
43	DA15DA15	DA15	DA15	GFP	DA15DA15_GFP	100	0.181607
44	DA15DA15	DA15	DA15	Glucosidase	DA15DA15_Glucosidase	NA	NA
45	DA15DA15	DA15	DA15	GFP	DA15DA15_GFP	NA	NA
46	DA15DA15	DA15	DA15	Glucosidase	DA15DA15_Glucosidase	-1.1	0.0590831
47	DA15DA15	DA15	DA15	GFP	DA15DA15_GFP	111.3	10.9959
48	DA15DA15	DA15	DA15	Glucosidase	DA15DA15_Glucosidase	-105	0.0510795
49	DA15DA15	DA15	DA15	GFP	DA15DA15_GFP	NA	NA
50	DA15DA15	DA15	DA15	Glucosidase	DA15DA15_Glucosidase	14.5	0.0176877
51	DA15DA15	DA15	DA15	GFP	DA15DA15_GFP	44	14.3094
52	DA15DA15	DA15	DA15	Glucosidase	DA15DA15_Glucosidase	0.6	2.88564
53	DA15DA15	DA15	DA15	GFP	DA15DA15_GFP	26.9	2.90571
54	DA15DA15	DA15	DA15	Glucosidase	DA15DA15_Glucosidase	74.2	0.131114
55	DA15DA15	DA15	DA15	GFP	DA15DA15_GFP	166.1	3.7552
56	DA15DA15	DA15	DA15	Glucosidase	DA15DA15_Glucosidase	-132.4	0.479263
57	DA15DA15	DA15	DA15	GFP	DA15DA15_GFP	-52.5	3.26909
58	DA15DA15	DA15	DA15	Glucosidase	DA15DA15_Glucosidase	NA	NA
59	DA15DA15	DA15	DA15	GFP	DA15DA15_GFP	NA	NA
60	DA15DA15	DA15	DA15	Glucosidase	DA15DA15_Glucosidase	157.4	0.177869

## Sheet: Figure4D
pot #	type	Choice3h
1	g17	TAGdef
2	g17	TAGdef
3	GFP	TAGdef
4	GFP	TAGdef
5	g17	control
6	GFP	TAGdef
7	g17	TAGdef
8	g17	NA
9	g17	TAGdef
10	g17	TAGdef
11	GFP	TAGdef
12	GFP	control
13	GFP	TAGdef
14	GFP	control
15	GFP	TAGdef
16	g17	TAGdef
17	g17	control
18	dead	dead
19	g17	TAGdef
20	g17	TAGdef
21	GFP	TAGdef
22	GFP	NA
23	g17	TAGdef
24	GFP	TAGdef
25	GFP	TAGdef
26	GFP	TAGdef
27	GFP	control
28	GFP	TAGdef
29	g17	TAGdef
30	GFP	TAGdef
31	g17	control
32	g17	control
33	GFP	control
34	g17	control
35	g17	control
36	g17	TAGdef
37	GFP	TAGdef
38	GFP	TAGdef
39	GFP	TAGdef
40	GFP	control
41	GFP	control
42	dead	dead
43	g17	control
44	g17	control
45	GFP	control
46	g17	control
47	GFP	NA
48	g17	control
49	g17	control
50	g17	control
51	g17	NA
52	GFP	TAGdef
53	GFP	TAGdef
54	GFP	TAGdef
55	g17	TAGdef
56	g17	NA
57	GFP	control
58	g17	TAGdef
59	GFP	TAGdef
60	g17	TAGdef
61	g17	NA
62	GFP	TAGdef
63	g17	control
64	g17	TAGdef
65	GFP	TAGdef
66	g17	NA
67	GFP	TAGdef
68	g17	TAGdef
69	g17	control
70	GFP	TAGdef
71	GFP	control
72	GFP	TAGdef
73	GFP	TAGdef
74	GFP	TAGdef

## Sheet: Figure4-FigureSupplement2
SeqNr	day	Gene	Concentration	Treat	TubExpressionRatio
1	2	GFP	2.5	GFP_2.5	1.014
2	2	GFP	0.25	GFP_0.25	1.149
3	2	Tub	2.5	Tub_2.5	0.2146
4	2	Tub	0.25	Tub_0.25	0.08304
5	2	GFP	2.5	GFP_2.5	0.8179
6	2	GFP	0.25	GFP_0.25	0.8011
7	2	Tub	2.5	Tub_2.5	0.1199
8	2	Tub	0.25	Tub_0.25	0.08247
9	2	GFP	2.5	GFP_2.5	1.042
10	2	GFP	0.25	GFP_0.25	0.79
11	2	Tub	2.5	Tub_2.5	0.2365
12	2	Tub	0.25	Tub_0.25	0.1241
13	5	GFP	2.5	GFP_2.5	0.9266
14	5	GFP	0.25	GFP_0.25	0.6462
15	5	Tub	2.5	Tub_2.5	0.04269
16	5	Tub	0.25	Tub_0.25	0.0477
17	5	GFP	2.5	GFP_2.5	0.8293
18	5	GFP	0.25	GFP_0.25	0.7071
19	5	Tub	2.5	Tub_2.5	0.09408
20	5	Tub	0.25	Tub_0.25	0.05219
21	5	GFP	2.5	GFP_2.5	0.9266
22	5	GFP	0.25	GFP_0.25	0.6598
23	5	Tub	2.5	Tub_2.5	0.06839
24	5	Tub	0.25	Tub_0.25	0.05479
25	10	GFP	2.5	GFP_2.5	0.8123
26	10	GFP	0.25	GFP_0.25	0.8351
27	10	Tub	2.5	Tub_2.5	0.06652
28	10	Tub	0.25	Tub_0.25	0.05517
29	10	GFP	2.5	GFP_2.5	0.669
30	10	GFP	0.25	GFP_0.25	1
31	10	Tub	2.5	Tub_2.5	NA
32	10	Tub	0.25	Tub_0.25	0.08247
33	10	GFP	2.5	GFP_2.5	1.275
34	10	GFP	0.25	GFP_0.25	1.125
35	10	Tub	2.5	Tub_2.5	0.07695
36	10	Tub	0.25	Tub_0.25	0.05517

## Sheet: Figure4-FigureSupplement3
SampeNr	Injection	Glu17	Glu16	Glu18
1	non_injected	0.671619	1.37146	0.0453019
2	non_injected	1.13738	1.53232	0.0597762
3	non_injected	5.524	4.94412	0.564762
4	non_injected	0.111546	0.832611	0.0367965
5	non_injected	2.00794	2.48926	0.163313
6	non_injected	0.155578	0.572646	0.00253414
7	non_injected	6.80085	1.83492	NA
1	GFP-injected	9.55141	2.25905	0.648741
2	GFP-injected	7.92117	5.87958	0.0851243
3	GFP-injected	1.98029	2.68647	0.0893564
4	GFP-injected	0.144157	1.44966	0.0416862
5	GFP-injected	1.16128	1.79715	0.0416862
6	GFP-injected	0.700139	1.52173	0.00952354
7	GFP-injected	0.215493	0.622314	NA
1	bGlc17-injected	0.0329338	1.63095	0.019994
2	bGlc17-injected	0.0672517	1.25328	0.0509672
3	bGlc17-injected	0.380433	3.19477	0.139247
4	bGlc17-injected	0.0478849	0.874006	0.0360393
5	bGlc17-injected	0.0211341	0.131735	0.127248
6	bGlc17-injected	0.0145354	1.55371	0.117092
7	bGlc17-injected	0.0645121	2.21256	0.0667871
8	bGlc17-injected	0.0449889	0.867968	0.129024

## Sheet: Figure4-FigureSupplement5
Larva_Nr	Larva_RNAi	Plant_Genotype	gain3w_g	gain8w_g	gain3to8w_g
1	GFP	DA48.1	0.194	1.344	1.15
2	GFP	DA48.15	0.164	1.344	1.18
3	GFP	DA48.1	0.246	1.286	1.04
4	GFP	DA48.15	0.152	1.422	1.27
5	GFP	DA48.15	-0.008	0.792	0.8
6	GFP	DA48.1	0.224	1.214	0.99
7	GFP	DA48.15	0.072	0.982	0.91
8	GFP	DA48.1	0.248	1.278	1.03
9	GFP	DA48.15	0.282	1.062	0.78
10	GFP	DA48.15	0.106	1.486	1.38
11	GFP	DA48.15	0.198	1.318	1.12
12	GFP	DA48.1	0.044	0.514	0.47
13	GFP	DA48.15	0.184	NA	NA
14	GFP	DA48.1	0.002	0.442	0.44
15	GFP	DA48.1	0.02	NA	NA
16	GFP	DA48.15	0.19	1.43	1.24
17	GFP	DA48.15	0.256	1.636	1.38
18	GFP	DA48.1	0.074	NA	NA
19	GFP	DA48.15	0.206	1.386	1.18
20	GFP	DA48.1	0.248	1.348	1.1
21	GFP	DA48.15	0.218	0.908	0.69
22	GFP	DA48.15	-0.026	0.634	0.66
23	GFP	DA48.15	0.01	1.03	1.02
24	GFP	DA48.1	0.104	1.164	1.06
25	GFP	DA48.15	-0.02	0.12	0.14
26	GFP	DA48.1	0.222	0.722	0.5
27	GFP	DA48.15	0.268	1.038	0.77
28	GFP	DA48.1	0.212	NA	NA
29	GFP	DA48.15	0.196	1.266	1.07
30	GFP	DA48.1	0.004	NA	NA
31	GFP	DA48.15	0.24	NA	NA
32	GFP	DA48.1	0.148	0.508	0.36
33	GFP	DA48.1	0.116	1.026	0.91
34	GFP	DA48.1	0.006	0.766	0.76
35	GFP	DA48.1	0.387	1.487	1.1
36	GFP	DA48.1	0.28	1.26	0.98
37	GFP	DA48.1	0.286	1.206	0.92
38	GFP	DA48.1	0.186	1.166	0.98
39	GFP	DA48.15	0.267	1.567	1.3
40	GFP	DA48.15	0.248	1.418	1.17
41	Glucosidase	DA48.15	0.187	0.977	0.79
42	Glucosidase	DA48.1	0.34	1.48	1.14
43	Glucosidase	DA48.15	NA	NA	NA
44	Glucosidase	DA48.1	0.261	1.751	1.49
45	Glucosidase	DA48.15	0.203	NA	NA
46	Glucosidase	DA48.1	0.203	NA	NA
47	Glucosidase	DA48.15	0.117	0.497	0.38
48	Glucosidase	DA48.1	0.034	NA	NA
49	Glucosidase	DA48.1	0.28	1.29	1.01
50	Glucosidase	DA48.15	0.226	0.806	0.58
51	Glucosidase	DA48.1	0.189	1.509	1.32
52	Glucosidase	DA48.15	0.289	1.289	1
53	Glucosidase	DA48.1	0.013	1.643	1.63
54	Glucosidase	DA48.1	0.327	1.257	0.93
55	Glucosidase	DA48.1	NA	NA	NA
56	Glucosidase	DA48.15	0.289	1.309	1.02
57	Glucosidase	DA48.15	0.219	1.389	1.17
58	Glucosidase	DA48.15	0.079	1.169	1.09
59	Glucosidase	DA48.1	0.171	0.601	0.43
60	Glucosidase	DA48.15	0.235	0.835	0.6
61	Glucosidase	DA48.1	NA	NA	NA
62	Glucosidase	DA48.15	0.159	1.129	0.97
63	Glucosidase	DA48.15	0.217	1.227	1.01
64	Glucosidase	DA48.1	0.24	1.19	0.95
65	Glucosidase	DA48.15	0.007	0.317	0.31
66	Glucosidase	DA48.1	0.017	0.087	0.07
67	Glucosidase	DA48.15	0.315	0.895	0.58
68	Glucosidase	DA48.15	0.026	0.336	0.31
69	Glucosidase	DA48.1	0.039	0.879	0.84
70	Glucosidase	DA48.15	0.12	0.55	0.43
71	Glucosidase	DA48.1	0.064	0.554	0.49
72	Glucosidase	DA48.1	0.138	0.778	0.64

## Sheet: Figure4-FigureSupplement6
pot #	type	Choice1h	Choice2h	Choice3h	Choice4h
1	g17	TAGdef	TAGdef	TAGdef	TAGdef
2	g17	control	TAGdef	TAGdef	TAGdef
3	GFP	TAGdef	TAGdef	TAGdef	TAGdef
4	GFP	TAGdef	TAGdef	TAGdef	TAGdef
5	g17	NA	control	control	TAGdef
6	GFP	control	control	TAGdef	NA
7	g17	NA	TAGdef	TAGdef	NA
8	g17	TAGdef	TAGdef	NA	control
9	g17	TAGdef	TAGdef	TAGdef	TAGdef
10	g17	TAGdef	TAGdef	TAGdef	TAGdef
11	GFP	TAGdef	TAGdef	TAGdef	TAGdef
12	GFP	control	control	control	control
13	GFP	NA	TAGdef	TAGdef	TAGdef
14	GFP	TAGdef	control	control	control
15	GFP	TAGdef	TAGdef	TAGdef	TAGdef
16	g17	control	TAGdef	TAGdef	control
17	g17	NA	TAGdef	control	control
18	dead	dead	dead	dead	dead
19	g17	control	control	TAGdef	TAGdef
20	g17	TAGdef	TAGdef	TAGdef	TAGdef
21	GFP	TAGdef	TAGdef	TAGdef	NA
22	GFP	NA	NA	NA	NA
23	g17	NA	control	TAGdef	control
24	GFP	TAGdef	TAGdef	TAGdef	TAGdef
25	GFP	control	TAGdef	TAGdef	TAGdef
26	GFP	TAGdef	TAGdef	TAGdef	TAGdef
27	GFP	NA	control	control	control
28	GFP	TAGdef	TAGdef	TAGdef	control
29	g17	NA	TAGdef	TAGdef	control
30	GFP	TAGdef	TAGdef	TAGdef	TAGdef
31	g17	TAGdef	control	control	control
32	g17	control	control	control	control
33	GFP	TAGdef	control	control	control
34	g17	control	NA	control	control
35	g17	control	control	control	NA
36	g17	control	control	TAGdef	control
37	GFP	NA	TAGdef	TAGdef	control
38	GFP	control	TAGdef	TAGdef	TAGdef
39	GFP	TAGdef	TAGdef	TAGdef	TAGdef
40	GFP	control	control	control	control
41	GFP	control	control	control	control
42	dead	dead	dead	dead	dead
43	g17	TAGdef	control	control	TAGdef
44	g17	control	control	control	TAGdef
45	GFP	control	NA	control	control
46	g17	control	control	control	control
47	GFP	TAGdef	NA	NA	NA
48	g17	TAGdef	TAGdef	control	control
49	g17	control	control	control	control
50	g17	control	NA	control	control
51	g17	NA	NA	NA	NA
52	GFP	TAGdef	TAGdef	TAGdef	TAGdef
53	GFP	TAGdef	TAGdef	TAGdef	TAGdef
54	GFP	TAGdef	TAGdef	TAGdef	TAGdef
55	g17	TAGdef	TAGdef	TAGdef	TAGdef
56	g17	NA	control	NA	TAGdef
57	GFP	control	control	control	control
58	g17	TAGdef	TAGdef	TAGdef	TAGdef
59	GFP	TAGdef	control	TAGdef	TAGdef
60	g17	TAGdef	TAGdef	TAGdef	control
61	g17	control	control	NA	control
62	GFP	control	control	TAGdef	TAGdef
63	g17	control	control	control	control
64	g17	TAGdef	TAGdef	TAGdef	TAGdef
65	GFP	TAGdef	TAGdef	TAGdef	TAGdef
66	g17	control	control	NA	NA
67	GFP	TAGdef	control	TAGdef	TAGdef
68	g17	control	TAGdef	TAGdef	TAGdef
69	g17	NA	TAGdef	control	control
70	GFP	TAGdef	TAGdef	TAGdef	control
71	GFP	control	NA	control	control
72	GFP	TAGdef	TAGdef	TAGdef	TAGdef
73	GFP	TAGdef	TAGdef	TAGdef	TAGdef
74	GFP	control	TAGdef	TAGdef	control
